# Supplementary material for: Genetic associations for keratoconus: a systematic review and meta-analysis
Source: PubMed Central journal article supplement (PMC5496893; doi:10.1038/s41598-017-04393-2), 2017-07-04
Supplement: 41598_2017_4393_MOESM1_ESM.pdf [file 41598_2017_4393_MOESM1_ESM.pdf]

## **Genetic associations for keratoconus: a systematic review and meta-analysis**

Shi Song Rong<sup>1,5</sup>, Sarah Tsz Ue Ma<sup>1</sup>, Xinting Yu<sup>1,3</sup>, Li Ma<sup>1</sup>, Wai Kit Chu<sup>1</sup>, Tommy Chung Yan Chan<sup>4</sup>, Yu Meng Wang<sup>1</sup>, Alvin L. Young<sup>1,2</sup>, Chi Pui Pang<sup>1</sup>, Vishal Jhanji<sup>1,2</sup>, Li Jia Chen<sup>1,2</sup>

<sup>1</sup> Department of Ophthalmology and Visual Sciences, The Chinese University of Hong Kong, Hong Kong, China;

<sup>2</sup> Department of Ophthalmology and Visual Sciences, Prince of Wales Hospital, Hong Kong, China;

<sup>3</sup> Faculty of Medicine, the Chinese University of Hong Kong, Hong Kong, China;

<sup>4</sup> Hong Kong Eye Hospital, Kowloon, Hong Kong, China;

<sup>5</sup> Current affiliation: Department of Ophthalmology, Harvard Medical School, Massachusetts Eye and Ear, Boston, Massachusetts, USA.

<sup>6</sup> Current affiliation: Department of Gastroenterology, Harvard Medical School, Beth Israel Deaconess Medical Center, Boston, Massachusetts, USA.

List of supplementary materials:

**Supplementary Table 1.** Summary of reported and meta-analysed genes/loci and polymorphisms for keratoconus

**Supplementary Table 2.** Allelic associations of gene variations with keratoconus in different populations

**Supplementary Table 3.** Quality assessment of case-control study using Newcastle - Ottawa scale (NOS)

**Supplementary Table 4.** Sensitivity analysis of allelic associations by excluding cohorts deviated from Hardy-Weinberg Equilibrium

**Supplementary Table 5.** Search strategies for MEDLINE and Embase databases on the Ovid platform

**Supplementary Figure 1.** Funnel plots of significant genetic associations for keratoconus

**Supplementary Appendix 1.** Modified Newcastle - Ottawa Quality Assessment Scale for case-control studies

**Supplementary Table 1. Summary of reported and meta-analysed genes/loci and polymorphisms for keratoconus**

|    | Official Symbol         | No. of SNPs reported | No. of SNPs meta-analysed |
|----|-------------------------|----------------------|---------------------------|
| 1  | <i>VSX1</i>             | 19                   | 5                         |
| 2  | <i>HGF</i>              | 15                   | 3                         |
| 3  | <i>CAST</i>             | 14                   | 0                         |
| 4  | <i>COL4A3</i>           | 11                   | 9                         |
| 5  | <i>COL4A4</i>           | 7                    | 6                         |
| 6  | <i>IL1B</i>             | 5                    | 2                         |
| 7  | <i>IL1RN</i>            | 5                    | 1                         |
| 8  | <i>LOX</i>              | 5                    | 4                         |
| 9  | <i>COL5A1</i>           | 4                    | 2                         |
| 10 | <i>IL1A</i>             | 3                    | 1                         |
| 11 | <i>TF</i>               | 3                    | 0                         |
| 12 | <i>TGFBI</i>            | 3                    | 0                         |
| 13 | <i>13q33.3</i>          | 2                    | 2                         |
| 14 | <i>CHSY1</i>            | 2                    | 0                         |
| 15 | <i>FEN1</i>             | 2                    | 0                         |
| 16 | <i>FGF9-SGCG</i>        | 2                    | 0                         |
| 17 | <i>HS3ST3B1-PMP22</i>   | 2                    | 0                         |
| 18 | <i>IMMP2L</i>           | 2                    | 2                         |
| 19 | <i>MPDZ-NFIB</i>        | 2                    | 1                         |
| 20 | <i>RAD51</i>            | 2                    | 0                         |
| 21 | <i>SMAD3</i>            | 2                    | 0                         |
| 22 | <i>XRCC1</i>            | 2                    | 0                         |
| 23 | <i>12p13.3</i>          | 1                    | 1                         |
| 24 | <i>19p12</i>            | 1                    | 1                         |
| 25 | <i>3q26.2</i>           | 1                    | 1                         |
| 26 | <i>ADAMTS6</i>          | 1                    | 0                         |
| 27 | <i>ARHGAP20-POU2AF1</i> | 1                    | 0                         |
| 28 | <i>ARID5B</i>           | 1                    | 0                         |
| 29 | <i>BANP-ZNF469</i>      | 1                    | 1                         |
| 30 | <i>BHLHE40</i>          | 1                    | 1                         |
| 31 | <i>BIRC8</i>            | 1                    | 1                         |
| 32 | <i>C7orf42</i>          | 1                    | 0                         |
| 33 | <i>COL8A2</i>           | 1                    | 0                         |
| 34 | <i>DOCK9</i>            | 1                    | 0                         |
| 35 | <i>FAM46A-IBTK</i>      | 1                    | 0                         |
| 36 | <i>FAS</i>              | 1                    | 0                         |
| 37 | <i>FASLG</i>            | 1                    | 0                         |
| 38 | <i>FNDC3B</i>           | 1                    | 1                         |
| 39 | <i>FOXO1</i>            | 1                    | 1                         |
| 40 | <i>GLT8D2</i>           | 1                    | 0                         |
| 41 | <i>hsa-mir-568</i>      | 1                    | 0                         |
| 42 | <i>KCND3</i>            | 1                    | 1                         |
| 43 | <i>KIF26B</i>           | 1                    | 1                         |
| 44 | <i>LCN12-PTGDS</i>      | 1                    | 0                         |
| 45 | <i>LPAR1</i>            | 1                    | 0                         |
| 46 | <i>LRRK1</i>            | 1                    | 0                         |
| 47 | <i>LRRN1</i>            | 1                    | 1                         |
| 48 | <i>MIR184</i>           | 1                    | 0                         |
| 49 | <i>MUTYH</i>            | 1                    | 0                         |
| 50 | <i>NEIL1</i>            | 1                    | 0                         |
| 51 | <i>NR3C2</i>            | 1                    | 0                         |
| 52 | <i>OGG1</i>             | 1                    | 0                         |
| 53 | <i>PARP1</i>            | 1                    | 0                         |
| 54 | <i>POLG</i>             | 1                    | 0                         |
| 55 | <i>PPP3CA</i>           | 1                    | 1                         |
| 56 | <i>PTGDS</i>            | 1                    | 0                         |
| 57 | <i>RAB3GAP1</i>         | 1                    | 1                         |
| 58 | <i>RXRA-COL5A1</i>      | 1                    | 1                         |
| 59 | <i>SOD1</i>             | 1                    | 0                         |
| 60 | <i>TBLIXRI-KCNMB2</i>   | 1                    | 0                         |
| 61 | <i>TJPI</i>             | 1                    | 0                         |
| 62 | <i>UBXN4</i>            | 1                    | 1                         |
| 63 | <i>VKORC1L1</i>         | 1                    | 0                         |
| 64 | <i>WNT10A</i>           | 1                    | 0                         |

No. = number; SNPs = single nucleotide polymorphism.

Supplementary Table 2. Allelic associations of gene variations with keratoconus in different populations

| No.                                               | Gene/locus         | SNP        | No. of cohorts | Ethnicity                     | Associated allele vs. Reference allele | Pooled sample size |         | Outcome*                    |                    | Heterogeneity         |                    | Egger's test (P)      |
|---------------------------------------------------|--------------------|------------|----------------|-------------------------------|----------------------------------------|--------------------|---------|-----------------------------|--------------------|-----------------------|--------------------|-----------------------|
|                                                   |                    |            |                |                               |                                        | Case               | Control | P                           | OR (95% CI)        | P (Q)                 | I <sup>2</sup> (%) |                       |
| <b>Based on both GWAS and replication studies</b> |                    |            |                |                               |                                        |                    |         |                             |                    |                       |                    |                       |
| 1                                                 | <i>FOXO1</i>       | rs2721051  | 3              | Whites                        | C vs. T                                | 1,031              | 6,757   | <b>1.5×10<sup>-9</sup></b>  | 0.63 (0.54 - 0.73) | 0.40                  | 11                 | 0.56                  |
| 2                                                 | <i>MPDZ-NFIB</i>   | rs1324183  | 3              | Whites                        | C vs. A                                | 1,032              | 6,759   | <b>1.8×10<sup>-4</sup></b>  | 0.72 (0.61 - 0.86) | 0.14                  | 49                 | 0.083                 |
| 3                                                 | <i>BANP-ZNF469</i> | rs9938149  | 3              | Whites                        | C vs. A                                | 1,030              | 6,757   | <b>2.6×10<sup>-4</sup></b>  | 0.76 (0.66 - 0.88) | 0.18                  | 42                 | 0.066                 |
| 4                                                 | <i>COL5A1</i>      | rs7044529  | 4              | Whites                        | C vs. T                                | 1335               | 7275    | <b>9.9×10<sup>-4</sup></b>  | 0.81 (0.71 - 0.92) | 0.41                  | 12                 | 0.12                  |
| 5                                                 | <i>HGF</i>         | rs3735520  | 5              | Whites                        | T vs. C                                | 1,101              | 4,356   | <b>3.6×10<sup>-3</sup></b>  | 1.32 (1.10 - 1.60) | 0.014                 | 66                 | 0.79                  |
| 6                                                 | <i>LOX</i>         | rs2956540  | 3              | Whites                        | G vs. C                                | 692                | 6,598   | 0.60                        | 0.89 (0.57 - 1.38) | 2.9×10 <sup>-4</sup>  | 91                 | 6.0×10 <sup>-5</sup>  |
| <b>Based on candidate gene studies</b>            |                    |            |                |                               |                                        |                    |         |                             |                    |                       |                    |                       |
| 1                                                 | <i>COL4A4</i>      | rs2229813  | 3              | Whites                        | G vs. A                                | 262                | 336     | <b>1.3×10<sup>-12</sup></b> | 2.38 (1.87 - 3.03) | 0.68                  | 0                  | 0.39                  |
|                                                   |                    | rs2229813  | 2              | Chinese and Arabic            | G vs. A                                | 209                | 252     | <b>0.047</b>                | 0.74 (0.56 - 1.00) | 0.27                  | 16                 | n.a.                  |
|                                                   |                    | rs2228557  | 3              | Whites                        | T vs. C                                | 261                | 335     | <b>4.5×10<sup>-7</sup></b>  | 0.54 (0.42 - 0.68) | 0.59                  | 0                  | 0.31                  |
|                                                   |                    | rs2229814  | 2              | Whites                        | T vs. C                                | 218                | 258     | 0.59                        | 1.07 (0.83 - 1.39) | 0.99                  | 0                  | n.a.                  |
|                                                   |                    | rs2228555  | 2              | Whites                        | G vs. A                                | 217                | 257     | 0.67                        | 1.06 (0.82 - 1.38) | 1.00                  | 0                  | n.a.                  |
| 2                                                 | <i>FNDC3B</i>      | rs4894535  | 2              | Chinese and Arabic            | T vs. C                                | 307                | 477     | 0.078                       | 1.25 (0.98 - 1.60) | 0.48                  | 0                  | n.a.                  |
| 3                                                 | <i>COL4A3</i>      | rs55703767 | 3              | Whites                        | T vs. G                                | 262                | 334     | 0.11                        | 0.19 (0.03 - 1.44) | 3.0×10 <sup>-14</sup> | 96                 | 3.4×10 <sup>-15</sup> |
|                                                   |                    | rs28381984 | 2              | Whites                        | T vs. C                                | 217                | 257     | 0.25                        | 0.86 (0.66 - 1.11) | 0.972                 | 0                  | n.a.                  |
|                                                   |                    | rs34019152 | 2              | Whites                        | A vs. G                                | 217                | 257     | 0.63                        | 0.86 (0.47 - 1.58) | 0.945                 | 0                  | n.a.                  |
|                                                   |                    | rs13424243 | 2              | Whites                        | C vs. G                                | 217                | 257     | 0.82                        | 1.08 (0.57 - 2.04) | 0.928                 | 0                  | n.a.                  |
|                                                   |                    | rs10178458 | 2              | Whites                        | T vs. C                                | 216                | 257     | 0.89                        | 1.02 (0.73 - 1.44) | 0.972                 | 0                  | n.a.                  |
|                                                   |                    | rs11677877 | 2              | Whites                        | G vs. A                                | 218                | 256     | 0.93                        | 1.02 (0.62 - 1.69) | 0.971                 | 0                  | n.a.                  |
|                                                   |                    | rs6436669  | 2              | Whites                        | G vs. A                                | 217                | 258     | 0.94                        | 0.99 (0.70 - 1.40) | 0.986                 | 0                  | n.a.                  |
| 4                                                 | <i>COL5A1</i>      | rs7044529  | 3              | Whites                        | C vs. T                                | 684                | 4,514   | 0.11                        | 0.88 (0.74 - 1.03) | 0.678                 | 0                  | 0.52                  |
|                                                   |                    | rs7044529  | 2              | Chinese and Arabic            | C vs. T                                | 317                | 491     | 0.95                        | 1.01 (0.73 - 1.40) | 0.590                 | 0                  | n.a.                  |
| 5                                                 | <i>VSY1</i>        | rs12480307 | 2              | Chinese and Indian            | G vs. A                                | 214                | 209     | 0.29                        | 2.06 (0.54 - 7.92) | 0.163                 | 49                 | n.a.                  |
|                                                   |                    | rs6138482  | 2              | Whites                        | A vs. G                                | 155                | 149     | 0.59                        | 1.10 (0.77 - 1.57) | 0.411                 | 0                  | n.a.                  |
|                                                   |                    | rs6138482  | 3              | Chinese, Korean, and Indian   | A vs. G                                | 459                | 406     | 0.98                        | 1.01 (0.70 - 1.45) | 0.068                 | 64                 | 0.026                 |
| 6                                                 | <i>FOXO1</i>       | rs2721051  | 2              | Chinese and Arabic            | C vs. T                                | 314                | 489     | 0.31                        | 0.79 (0.50 - 1.25) | 0.377                 | 0                  | n.a.                  |
| 7                                                 | <i>BANP-ZNF469</i> | rs9938149  | 2              | Chinese and Arabic            | C vs. A                                | 316                | 491     | 0.32                        | 0.86 (0.65 - 1.15) | 0.893                 | 0                  | n.a.                  |
| 8                                                 | <i>IL1B</i>        | rs16944    | 3              | Chinese, Korean, and Japanese | T vs. C                                | 366                | 590     | 0.43                        | 0.86 (0.60 - 1.25) | 0.043                 | 70                 | 0.66                  |
| 9                                                 | <i>MPDZ-NFIB</i>   | rs1324183  | 2              | Chinese and Arabic            | C vs. A                                | 317                | 491     | 0.63                        | 0.87 (0.49 - 1.54) | 0.020                 | 82                 | n.a.                  |

\* A random-effects model was used.

† Asian ancestries included 2 or more ethnic groups from Arabic, Chinese, Korean, Japanese, or Indian populations.

CI=confidence interval; OR=odds ration; SNP = single nucleotide polymorphism; n.a. = not applicable; No. = number.

**Supplementary Table 3. Quality assessment of case-control study using Newcastle - Ottawa scale (NOS)\***

| No. | First author (year)             | Stars awarded | Selection |     |     |     | Comparability |      | Exposure |     |      |
|-----|---------------------------------|---------------|-----------|-----|-----|-----|---------------|------|----------|-----|------|
|     |                                 |               | (1)       | (2) | (3) | (4) | (1a)          | (1b) | (1)      | (2) | (3)  |
| 1   | Abu-Amero, K. K., et al. (2015) | 6             | *         | *   | -   | *   | *             | -    | *        | *   | n.a. |
| 2   | Dudakova, L., et al. (2015)     | 5             | *         | *   | -   | *   | *             | -    | *        | -   | n.a. |
| 3   | Hao, X. D., et al. (2015)       | 8             | *         | *   | *   | *   | *             | *    | *        | *   | n.a. |
| 4   | Hasanian-Langroudi, F. (2015)   | 5             | *         | -   | -   | *   | *             | *    | *        | -   | n.a. |
| 5   | Saravani, R. (2015)             | 6             | *         | -   | -   | *   | *             | *    | *        | *   | n.a. |
| 6   | Kokolakis, N. S. (2014)         | 7             | *         | -   | *   | *   | *             | *    | *        | *   | n.a. |
| 7   | Karolak, J. A., et al. (2014)   | 6             | *         | *   | -   | *   | *             | -    | *        | *   | n.a. |
| 8   | Sahebjada, S. (2014)            | 6             | *         | -   | *   | *   | *             | -    | *        | *   | n.a. |
| 9   | Palamar, M. (2014)              | 6             | *         | -   | -   | *   | *             | *    | *        | *   | n.a. |
| 10  | Bae, H. A. (2013)               | 8             | *         | *   | *   | *   | *             | *    | *        | *   | n.a. |
| 11  | Li, X. (2013)                   | 6             | *         | *   | *   | -   | *             | -    | *        | *   | n.a. |
| 12  | Sahebjada, S. (2013)            | 6             | *         | -   | *   | *   | *             | -    | *        | *   | n.a. |
| 13  | Mikami, T. (2013)               | 6             | *         | -   | -   | *   | *             | *    | *        | *   | n.a. |
| 14  | Verma, A. (2013)                | 5             | *         | -   | -   | *   | *             | -    | *        | *   | n.a. |
| 15  | Lu, Y. (2013)†                  | 7             | *         | *   | *   | *   | *             | -    | *        | *   | n.a. |
| 16  | Wang, Y. (2013)                 | 6             | *         | -   | -   | *   | *             | *    | *        | *   | n.a. |
| 17  | Bykhovskaya, Y. (2012)†         | 6             | *         | *   | *   | *   | *             | -    | *        | -   | n.a. |
| 18  | Li, X. (2012)†                  | 6             | *         | *   | *   | *   | *             | -    | *        | *   | n.a. |
| 19  | Burdon, K. P. (2011)†           | 6             | *         | *   | *   | *   | *             | -    | *        | *   | n.a. |
| 20  | Stabuc-Silih, M. (2010)         | 5             | *         | -   | -   | *   | *             | -    | *        | *   | n.a. |
| 21  | Stabuc-Silih, M. (2010)         | 5             | *         | -   | -   | *   | *             | -    | *        | *   | n.a. |
| 22  | Stabuc-Silih, M. (2009)         | 5             | *         | -   | -   | *   | *             | -    | *        | *   | n.a. |
| 23  | Kim, S. H. (2008)               | 8             | *         | *   | *   | *   | *             | *    | *        | *   | n.a. |
| 24  | Mok, J. W. (2008)               | 7             | *         | *   | *   | *   | *             | -    | *        | *   | n.a. |

\*Newcastle - Ottawa Quality assessment scale was detailed in Supplementary Appendix 1.

† Genome-wide association study

"-" means no star was awarded. n.a. = not applicable.

**Supplementary Table 4. Sensitivity analysis of allelic associations by excluding cohorts deviated from Hardy-Weinberg Equilibrium**

| No.                                               | Gene/locus    | SNP        | No. of cohorts | Ethnicity            | Associated allele vs. Reference allele | Pooled sample size |         | Outcome*                    |                     | Heterogeneity         |                    | Egger's test (P) |
|---------------------------------------------------|---------------|------------|----------------|----------------------|----------------------------------------|--------------------|---------|-----------------------------|---------------------|-----------------------|--------------------|------------------|
|                                                   |               |            |                |                      |                                        | Case               | Control | P                           | OR (95% CI)         | P (Q)                 | I <sup>2</sup> (%) |                  |
| <b>Based on both GWAS and replication studies</b> |               |            |                |                      |                                        |                    |         |                             |                     |                       |                    |                  |
| 1                                                 | <i>FOXO1</i>  | rs2721051  | 4              | Multiple ancestries† | C vs. T                                | 1,139              | 7,058   | <b>4.4×10<sup>-11</sup></b> | 0.64 (0.56 - 0.73)  | 0.490                 | 0                  | 0.83             |
| <b>Based on candidate gene studies</b>            |               |            |                |                      |                                        |                    |         |                             |                     |                       |                    |                  |
| 1                                                 | <i>FOXO1</i>  | rs2721051  | 2              | Multiple ancestries† | C vs. T                                | 265                | 974     | <b>7.5×10<sup>-3</sup></b>  | 0.68 (0.51 - 0.90)  | 0.523                 | 0                  | n.a.             |
| 2                                                 | <i>COL4A3</i> | rs10178458 | 2              | Multiple ancestries† | T vs. C                                | 209                | 201     | 0.87                        | 0.97 (0.65 - 1.44)  | 0.745                 | 0                  | n.a.             |
|                                                   |               | rs55703767 | 3              | Multiple ancestries† | T vs. G                                | 256                | 279     | 0.43                        | 0.46 (0.07 - 3.08)  | 3.1×10 <sup>-11</sup> | 96                 | 0.45             |
| 3                                                 | <i>COL4A4</i> | rs55703767 | 2              | Whites               | T vs. G                                | 158                | 177     | 0.46                        | 0.32 (0.016 - 6.54) | 3.1×10 <sup>-11</sup> | 98                 | n.a.             |
|                                                   |               | rs2228555  | 2              | Multiple ancestries† | G vs. A                                | 225                | 250     | 0.86                        | 1.02 (0.79 - 1.33)  | 0.807                 | 0                  | n.a.             |
|                                                   |               | rs2229813  | 4              | Multiple ancestries† | G vs. A                                | 367                | 431     | 0.46                        | 1.27 (0.68 - 2.40)  | 1.3×10 <sup>-6</sup>  | 89                 | 0.42             |
|                                                   |               | rs2229813  | 2              | Whites               | G vs. A                                | 158                | 179     | <b>3.5×10<sup>-7</sup></b>  | 2.30 (1.67 - 3.16)  | 0.42                  | 0                  | n.a.             |
| 4                                                 | <i>VSXI</i>   | rs2229814  | 2              | Multiple ancestries† | T vs. C                                | 211                | 201     | 0.95                        | 1.01 (0.77 - 1.33)  | 0.634                 | 0                  | n.a.             |
|                                                   |               | rs12480307 | 2              | Multiple ancestries† | G vs. A                                | 159                | 158     | 0.23                        | 1.27 (0.86 - 1.88)  | 0.625                 | 0                  | n.a.             |

\* A random-effects model was used.

† Multiple ancestries included 2 or more ethnic groups from Whites and Asian (i.e., Arabic, Chinese, Korean, Japanese, or Indian).

CI=confidence interval; OR=odds ratio; SNP = single nucleotide polymorphism; n.a. = not applicable; No. = number.

**Supplementary Table 5. Search strategies for MEDLINE and Embase databases on the Ovid platform**

| <b>No.</b> | <b>Search terms</b>                                               |
|------------|-------------------------------------------------------------------|
| 1          | polymorphism*.mp.                                                 |
| 2          | nucleotide*.mp.                                                   |
| 3          | variant*.mp.                                                      |
| 4          | genom*.mp.                                                        |
| 5          | mutation*.mp.                                                     |
| 6          | (locus or loci).mp.                                               |
| 7          | DNA.mp.                                                           |
| 8          | intron.mp.                                                        |
| 9          | (exon or exome).mp.                                               |
| 10         | allele*.mp.                                                       |
| 11         | haplotype*.mp.                                                    |
| 12         | genotyp*.mp.                                                      |
| 13         | genetic*.mp.                                                      |
| 14         | 1 or 2 or 3 or 4 or 5 or 6 or 7 or 8 or 9 or 10 or 11 or 12 or 13 |
| 15         | keratoconus.mp. or exp Keratoconus/                               |
| 16         | 14 and 15                                                         |

No.=number

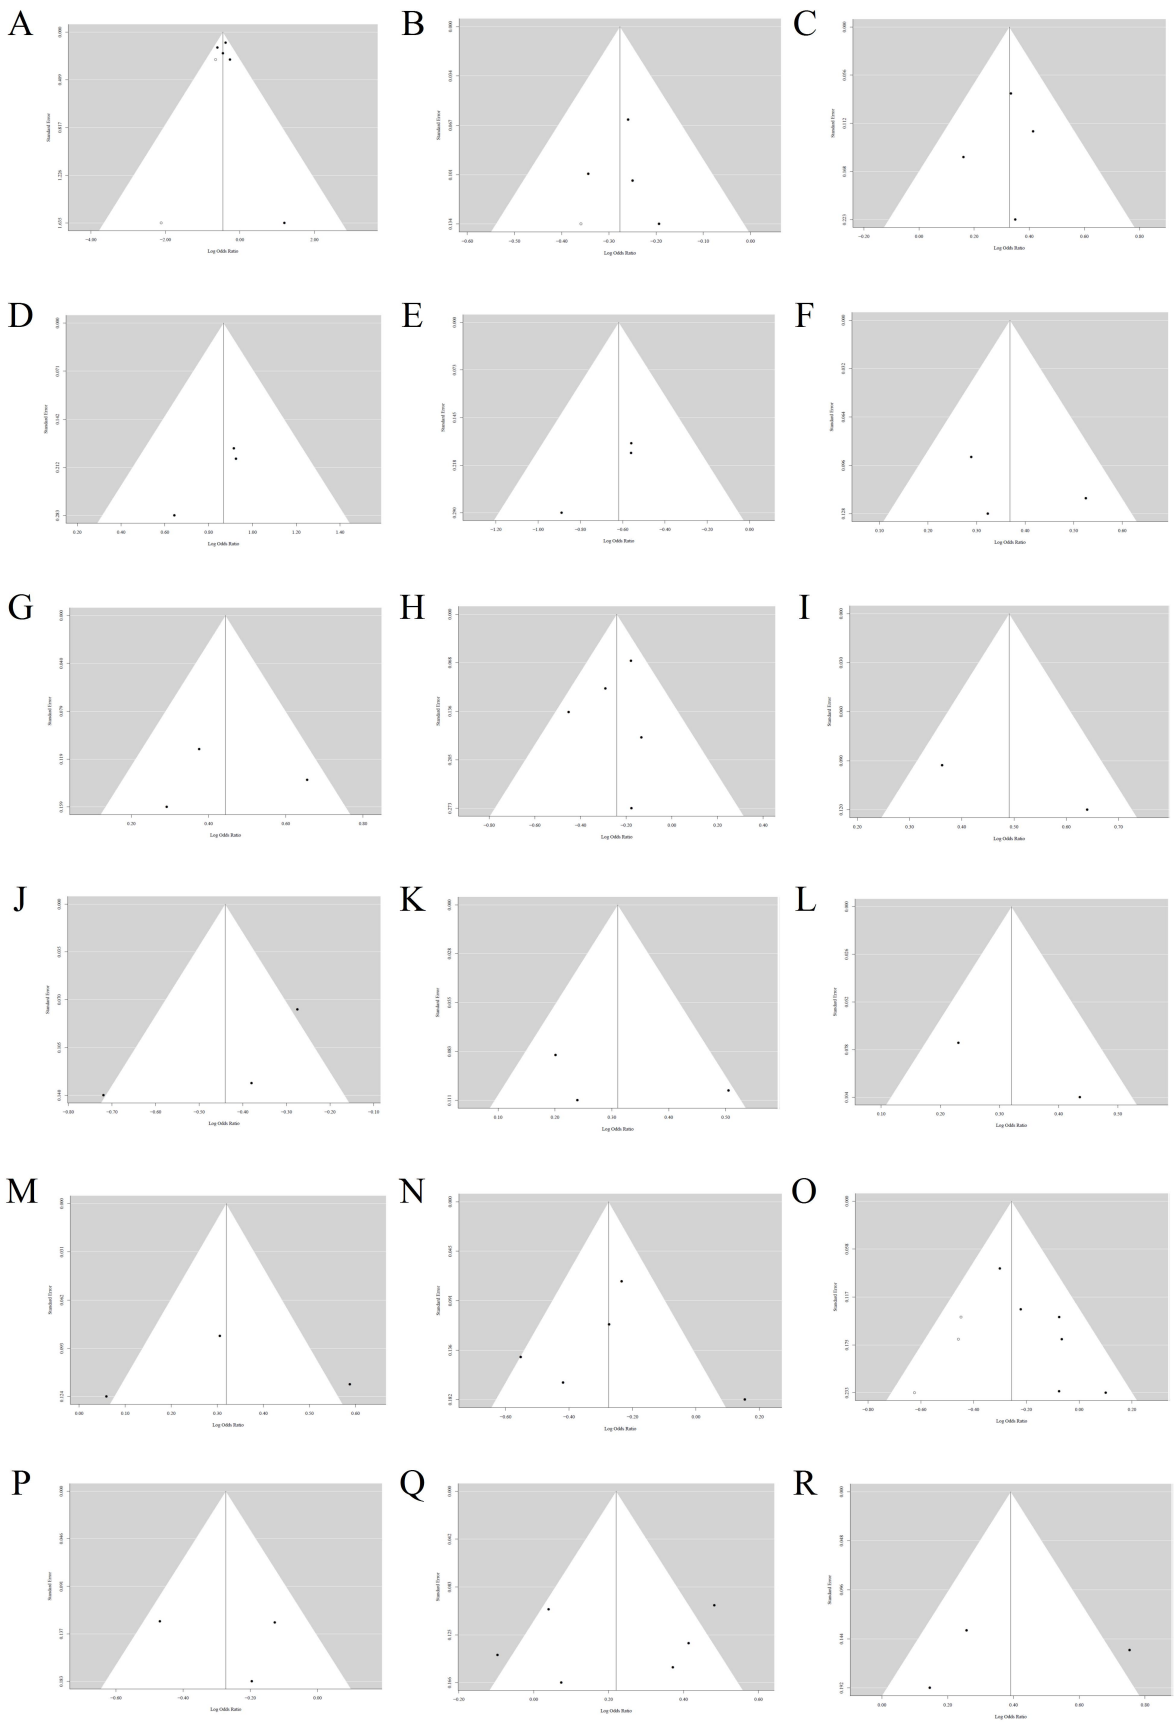



**Supplementary Figure 1. Funnel plots of significant genetic associations for keratoconus**

A: *FOXO1* rs2721051 ( $P_{\text{meta}}=5.6 \times 10^{-11}$ ,  $P_{\text{Egger}}=0.35$ ); B: *RXRA-COL5A1* rs1536482 ( $P_{\text{meta}}=2.5 \times 10^{-9}$ ,  $P_{\text{Egger}}=0.89$ ); C: *FNDC3B* rs4894535 ( $P_{\text{meta}}=1.4 \times 10^{-8}$ ,  $P_{\text{Egger}}=0.76$ ); D: *COL4A4* rs2229813 ( $P_{\text{meta}}=1.3 \times 10^{-12}$ ,  $P_{\text{Egger}}=0.39$ ); E: *COL4A4* rs2228557 ( $P_{\text{meta}}=4.5 \times 10^{-7}$ ,  $P_{\text{Egger}}=0.31$ ); F: *IMMP2L* rs757219 ( $P_{\text{meta}}=6.1 \times 10^{-7}$ ,  $P_{\text{Egger}}=0.61$ ); G: *IMMP2L* rs214884 ( $P_{\text{meta}}=2.3 \times 10^{-5}$ ,  $P_{\text{Egger}}=0.89$ ); H: *BANP-ZNF469* rs9938149 ( $P_{\text{meta}}=1.3 \times 10^{-5}$ ,  $P_{\text{Egger}}=0.77$ ); I: *KCND3* rs4839200 ( $P_{\text{meta}}=3.9 \times 10^{-4}$ ,  $P_{\text{Egger}}=\text{n.a.}$ ); J: *RAB3GAP1* rs4954218 ( $P_{\text{meta}}=8.2 \times 10^{-4}$ ,  $P_{\text{Egger}}=0.19$ ); K: *UBXD2* rs6430585 ( $P_{\text{meta}}=1.1 \times 10^{-3}$ ,  $P_{\text{Egger}}=0.62$ ); L: *13q33.3* rs1328089 ( $P_{\text{meta}}=1.7 \times 10^{-3}$ ,  $P_{\text{Egger}}=\text{n.a.}$ ); M: *13q33.3* rs1328083 ( $P_{\text{meta}}=3.0 \times 10^{-2}$ ,  $P_{\text{Egger}}=0.88$ ); N: *MPDZ-NFIB* rs1324183 ( $P_{\text{meta}}=5.5 \times 10^{-3}$ ,  $P_{\text{Egger}}=0.75$ ); O: *COL5A1* rs7044529 ( $P_{\text{meta}}=7.0 \times 10^{-3}$ ,  $P_{\text{Egger}}=0.051$ ); P: *LOX* rs10519694 ( $P_{\text{meta}}=0.018$ ,  $P_{\text{Egger}}=0.74$ ); Q: *HGF* rs3735520 ( $P_{\text{meta}}=0.027$ ,  $P_{\text{Egger}}=0.60$ ); R: *19p12* rs8111998 ( $P_{\text{meta}}=0.035$ ,  $P_{\text{Egger}}=0.74$ ); n.a.=not applicable

## Supplementary Appendix 1

### NEWCASTLE - OTTAWA QUALITY ASSESSMENT SCALE CASE CONTROL STUDIES

(accessed via [http://www.ohri.ca/programs/clinical\\_epidemiology/oxford.asp](http://www.ohri.ca/programs/clinical_epidemiology/oxford.asp))

Note: A study can be awarded a maximum of one star for each numbered item within the Selection and Exposure categories. A maximum of two stars can be given for Comparability.

#### Selection

- 1) Is the case definition adequate?
  - a) yes, with independent validation
  - b) yes, e.g. record linkage or based on self reports
  - c) no description
- 2) Representativeness of the cases
  - a) consecutive or obviously representative series of cases
  - b) potential for selection biases or not stated
- 3) Selection of Controls
  - a) community controls
  - b) hospital controls
  - c) no description
- 4) Definition of Controls
  - a) no history of disease (endpoint)
  - b) no description of source

#### Comparability

- 1) Comparability of cases and controls on the basis of the design or analysis
  - a) study controls for \_\_\_\_\_ (Select the most important factor: ethnicity)
  - b) study controls for any additional factor (This criteria could be modified to indicate specific control for a second important factor.)

#### Exposure

- 1) Ascertainment of exposure
  - a) secure record (e.g. surgical records)
  - b) structured interview where blind to case/control status
  - c) interview not blinded to case/control status
  - d) written self report or medical record only
  - e) no description
- 2) Same method of ascertainment for cases and controls
  - a) yes
  - b) no

3) Non-Response rate (\*This item was not applicable for this study.)

a) same rate for both groups

b) non respondents described

c) rate different and no designation
